# Supplementary material for: Manipulation of diacylglycerol and ERK-mediated signaling differentially controls CD8+ T cell responses during chronic viral infection
Source: PubMed Central journal article supplement (PMC9951774; doi:10.3389/fimmu.2022.1032113), 2022-11-24
Supplement: DataSheet_1.pdf [file DataSheet_1.pdf]

| Target              | Clone             | Fluorochrome | Company           |
|---------------------|-------------------|--------------|-------------------|
| Bcl-2               | BCL/10C4          | PE           | Biolegend         |
| Bcl-2               | 10C4              | PE-Cy7       | eBioscience       |
| Bim                 | H-5               | FITC         | Santa Cruz        |
| CD107a (LAMP-1)     | 1D4B              | PE           | Biolegend         |
| CD127               | A7R34             | BV 711       | Biolegend         |
| CD223 (Lag3)        | C9B7W             | BV711        | BD Biosciences    |
| CD244.2 (2B4)       | eBio244F4         | FITC         | eBioscience       |
| CD279 (PD-1)        | 29F.1A12          | PE-Cy7       | Biolengend        |
| CD279 (PD-1)        | 29F.1A12          | BV421        | Biolengend        |
| CD279 (PD-1)        | 29F.1A12          | PE           | Biolengend        |
| CD366 (Tim3)        | RMT3-23           | CD605        | Biolegend         |
| CD4                 | RM4-5             | APC-eF780    | eBioscience       |
| CD44                | IM7               | BV711        | Biolegend         |
| CD45R (B220)        | RA3-6B2           | APC-eF780    | eBioscience       |
| CD45.1              | A20               | PE-Cy7       | Biolegend         |
| CD62L               | MEL-14            | BV605        | Biolegend         |
| CD8a                | 53-6.7            | PE-eF610     | eBioscience       |
| CD8a                | 53-6.7            | BV421        | Biolegend         |
| CD8a                | 53-6.7            | BV650        | Biolegend         |
| CD8a                | SK1               | BV711        | Biolegend         |
| CD90.2 (Thy1.2)     | 53-2.1            | APC          | eBioscience       |
| Eomes               | Dan11mg           | PE-eF610     | Biolegend         |
| IFN $\gamma$        | 4S.B3             | PE-eF610     | eBioscience       |
| KLRG1               | 2F1               | FITC         | Southern Biotech  |
| pERK                | 6B8B69            | PE           | Biolegend         |
| pS6                 | A17029B           | PECy7        | Biolegend         |
| pS6                 | D57.2.2E          | PECy7        | Cell signaling    |
| Tigit               | 1G9               | BV421        | BD Biosciences    |
| Dead cell           | Live/Dead Near-IR |              | ThermoFisher      |
| LCMV GP33 tetramer  | KAVYNFATC         | PE           | MBL international |
| LCMV GP276 tetramer | SGVENPGGYCL       | APC          | MBL international |
| CD3e                | 145-2C11          | -            | BD Biosciences    |

**Supplementary Table 1. Flow cytometry antibodies.** List of fluorophore-conjugated antibodies used for surface staining for flow cytometry and cell sorting.

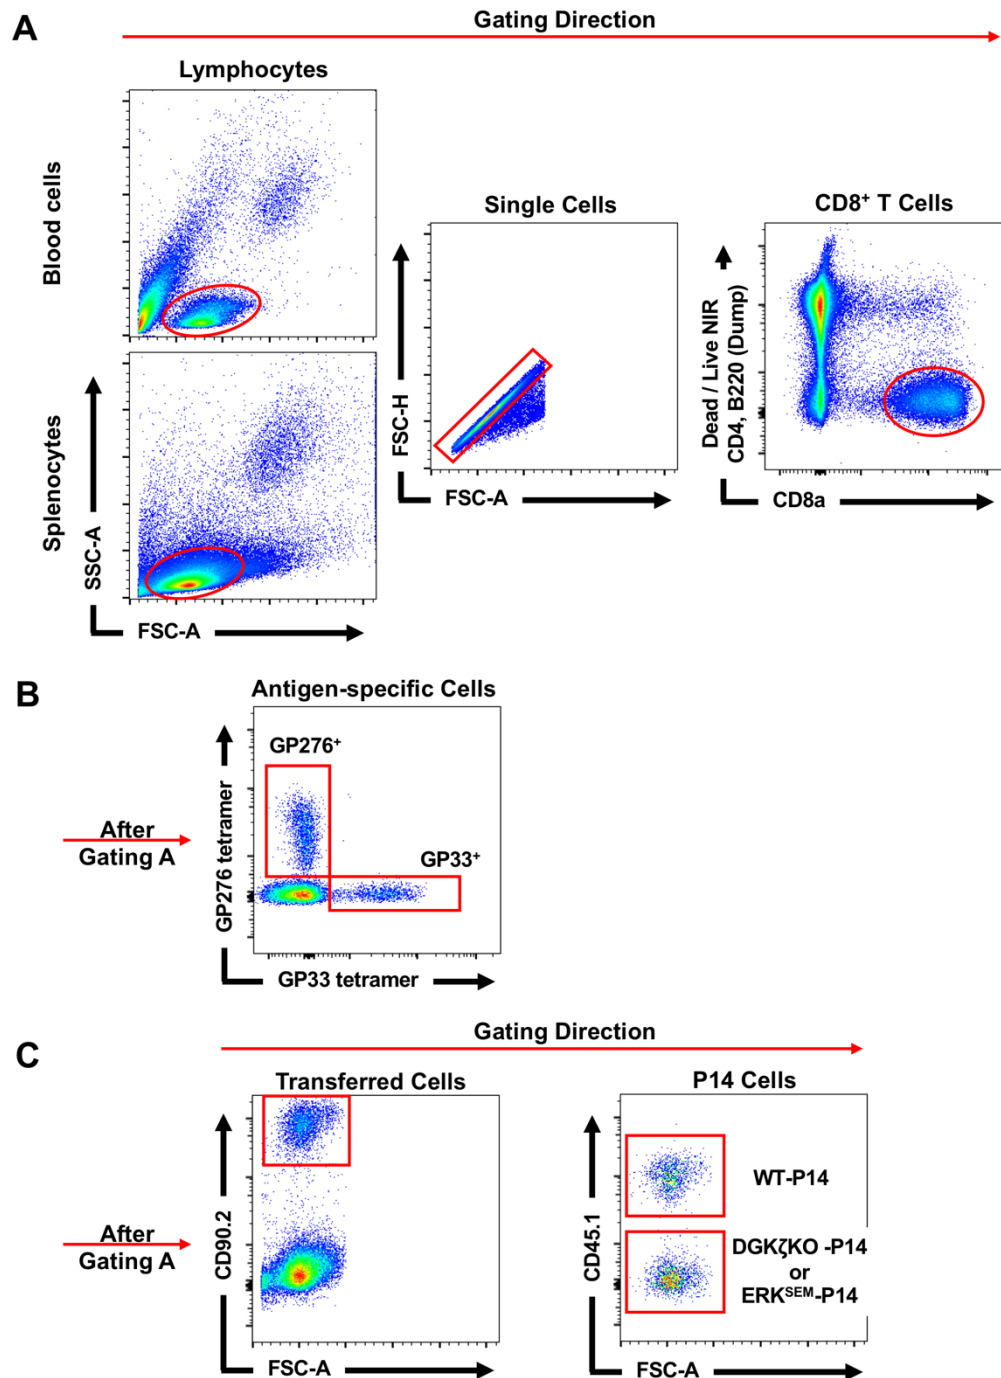

**Supplementary Figure 1. Gating strategy employed for flow cytometry. (A)** Blood cells or splenocytes were gated by FSC and SSC, followed by live single cells, and CD8<sup>+</sup> T cell gating. **(B)** Gated CD8<sup>+</sup> T cells were gated on GP33-tetramer or GP276-tetramer-positive cells. **(C)** In adoptive transfer studies, single CD8<sup>+</sup> T cells were gated on Thy1.2 followed by either CD45.1<sup>+</sup> or CD45.2<sup>+</sup> cell gating.

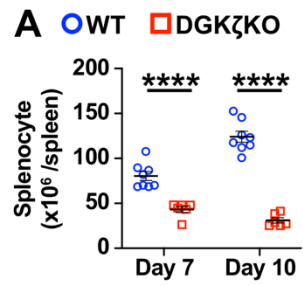

**Supplementary Figure 2.** Splenocytes from DGKζ KO mice are decreased after LCMV CL13 infection. **(A)** The absolute number of splenocytes were counted in WT and DGKζ KO mice at Days 7 and 10 post LCMV CL13 infection. \*\*\*\* $p < 0.0001$  by Student t-test.

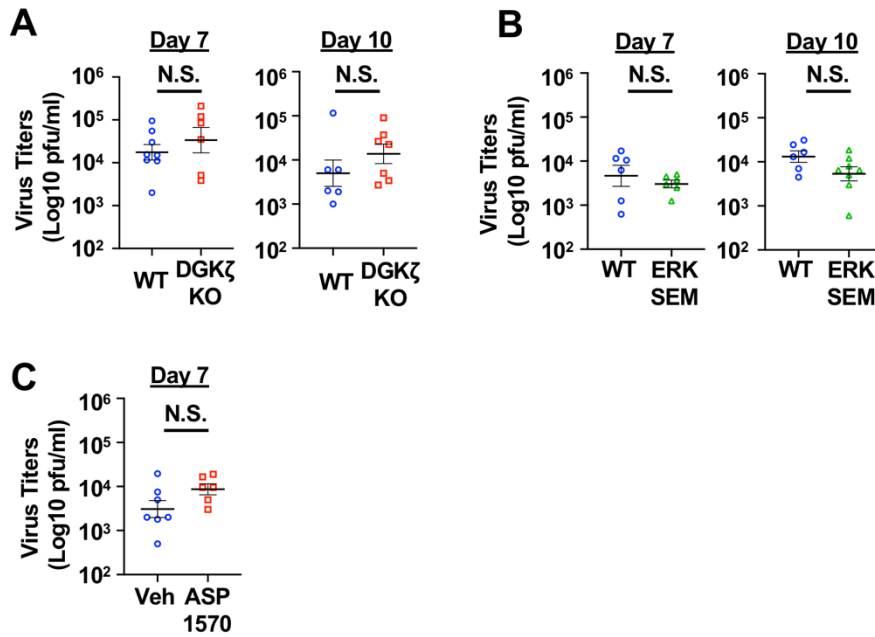

**Supplementary Figure 3. Serum virus titers.** (A) Virus titers of WT and DGK $\zeta$  KO mice on Days 7 and 10 post LCMV CL13 infection. (B) Virus titers of WT and ERK<sup>SEM</sup> mice on Day 7 and 10 post LCMV CL13 infection. (C) Virus titers of vehicle and ASP1570-treated mice on Day 7 post LCMV CL13 infection. N.S. = not significant by Student t-test.

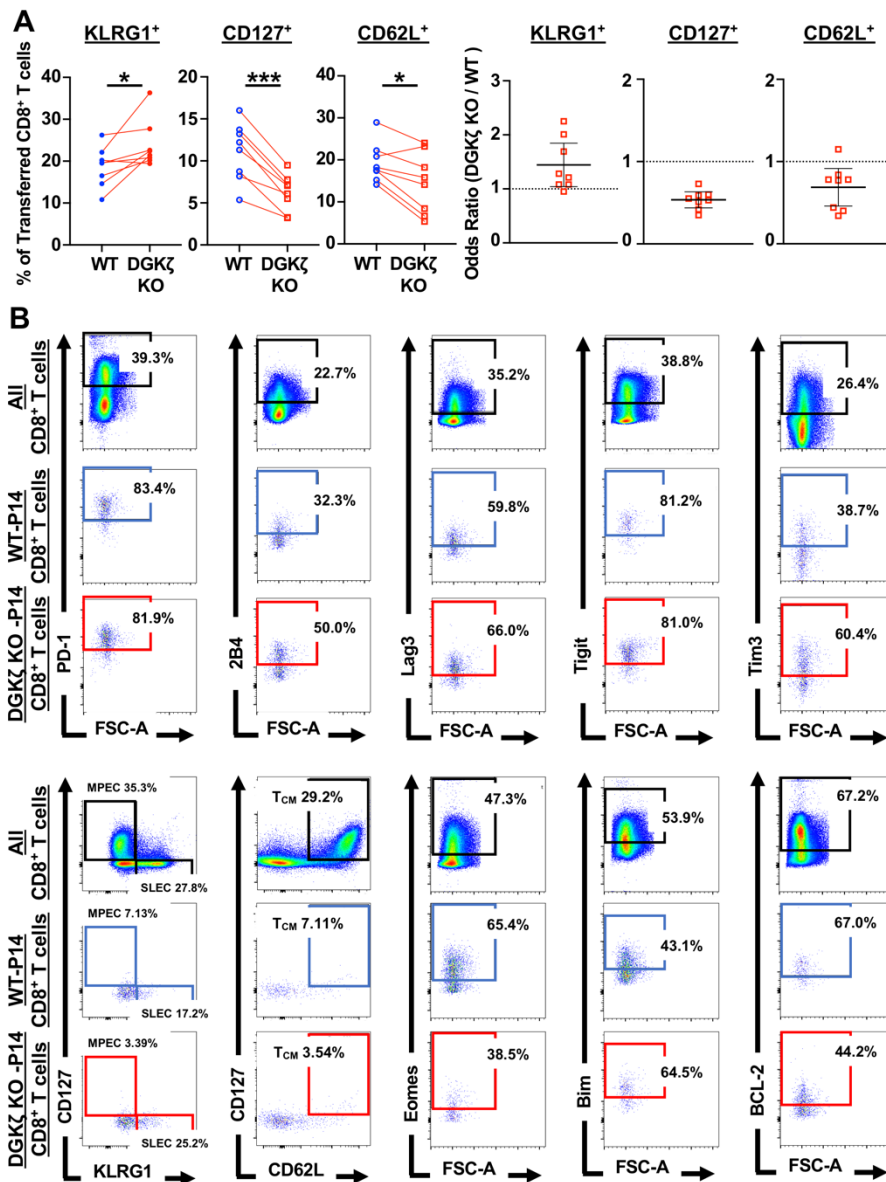

**Supplementary Figure 4. Expression of cell surface markers on DGK $\zeta$  KO LCMV-specific T cells. (A)** CD8<sup>+</sup> T cells from WT-P14 (CD45.1<sup>+</sup>) and DGK $\zeta$  KO-P14 (CD45.2<sup>+</sup>) mice were mixed at a 1:1 ratio and adoptively transferred into Thy1.1<sup>+</sup> WT host mice 1 day before infection with LCMV CL13. The fraction and odds ratio of WT and DGK $\zeta$  KO T cells expressing KLRG1, CD127, or CD62L were quantified at Day 10 post LCMV CL13 infection. Data from N=6 mice/group pooled from 2 independent experiments are shown. N.S. = not significant, \*p<0.05, \*\*P<0.01, \*\*\*\*p<0.0001 by paired Student t-test. **(B)** Representative flow cytometry plots of all CD8<sup>+</sup> T cells, WT P14 CD8<sup>+</sup> T cells, and DGK $\zeta$  KO P14 CD8<sup>+</sup> T cells expressing PD-1, 2B4, LAG3, TIGIT, TIM3, KLRG1, CD127, CD62L, Eomes, Bim, BCL-2 is shown.

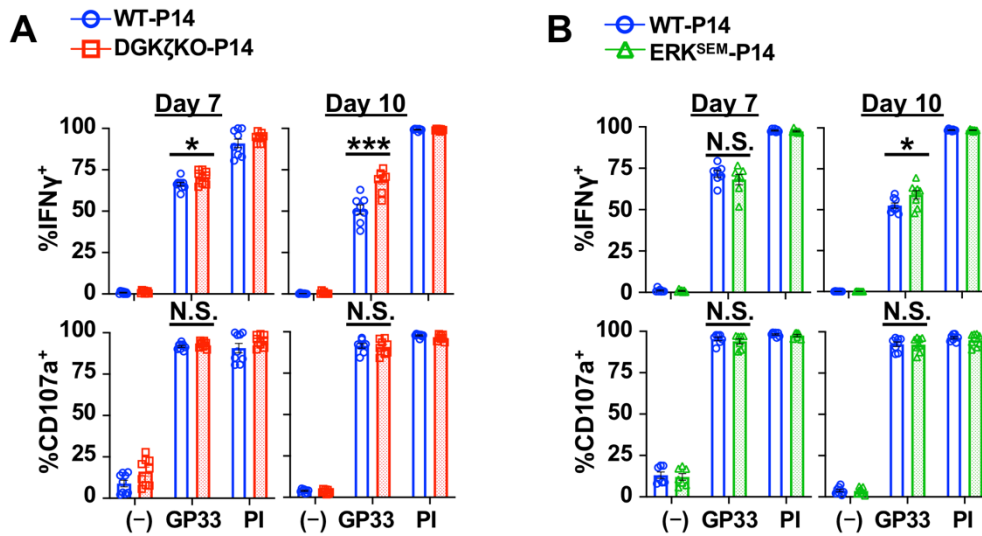

**Supplementary Figure 5. Restimulation of P14 T cells.** (A) CD8<sup>+</sup> T cells from WT-P14 (CD45.1<sup>+</sup>) and DGK $\zeta$  KO-P14 (CD45.2<sup>+</sup>) mice were mixed at a 1:1 ratio and adoptively transferred into Thy1.1<sup>+</sup> WT host mice 1 day before infection with LCMV CL13. On Days 7 and 10 post infection, splenocytes were restimulated with GP33 peptide or PMA/ionomycin (PI). The fraction of CD8<sup>+</sup> T cells expressing IFN $\gamma$  or CD107a was quantified. (B) CD8<sup>+</sup> T cells from WT-P14 (CD45.1<sup>+</sup>) and ERK<sup>SEM</sup> P14 (CD45.2<sup>+</sup>) mice were mixed at a 1:1 ratio and adoptively transferred into Thy1.1<sup>+</sup> WT host mice 1 day before infection with LCMV CL13. On Days 7 and 10 post infection, splenocytes were restimulated with GP33 peptide or PMA/ionomycin (PI). The fraction of CD8<sup>+</sup> T cells expressing IFN $\gamma$  or CD107a was quantified. N.S. = not significant, \*p<0.05, \*\*\*p<0.001 by paired Student t-test.

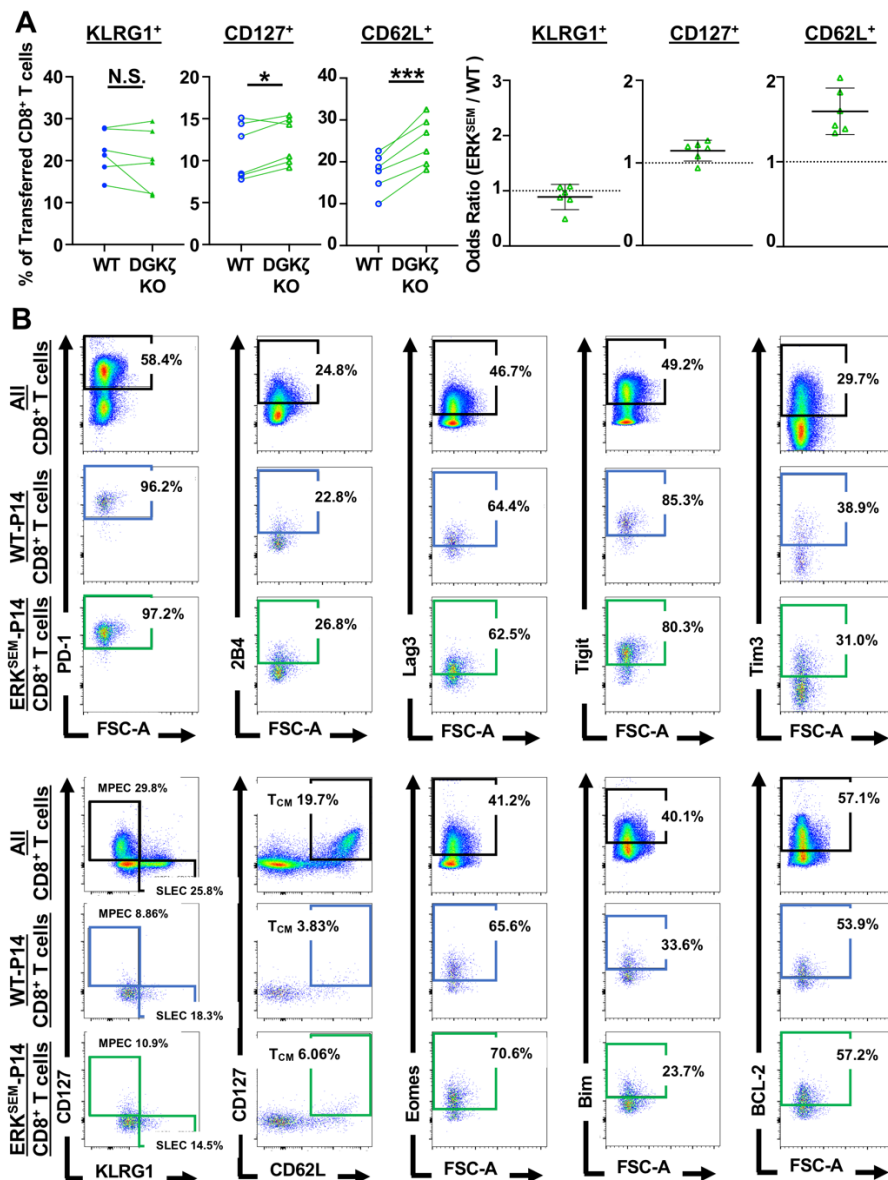

**Supplementary Figure 6. Expression of cell surface markers on ERK<sup>SEM</sup> LCMV-specific T cells.** (A) CD8<sup>+</sup> T cells from WT-P14 (CD45.1<sup>+</sup>) and ERK<sup>SEM</sup>-P14 (CD45.2<sup>+</sup>) mice were mixed at a 1:1 ratio and adoptively transferred into Thy1.1<sup>+</sup> WT host mice 1 day before infection with LCMV CL13. The fraction and odds ratio of WT and ERK<sup>SEM</sup> T cells expressing KLRG1, CD127, or CD62L were quantified at Day 10 post LCMV CL13 infection. Data from N=6 mice/group pooled from 2 independent experiments are shown. N.S. = not significant, \*p<0.05, \*\*p<0.01, \*\*\*\*p<0.0001 by paired Student t-test. (B) Representative flow cytometry plots of all CD8<sup>+</sup> T cells, WT P14 CD8<sup>+</sup> T cells, and ERK<sup>SEM</sup> P14 CD8<sup>+</sup> T cells expressing PD-1, 2B4, LAG3, TIGIT, TIM3, KLRG1, CD127, CD62L, Eomes, Bim, BCL-2 is shown.

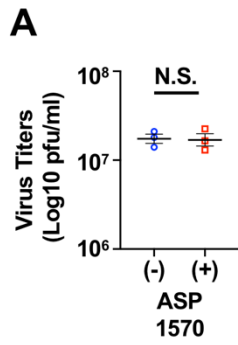

**Supplementary Figure 7. The effect of ASP1570 on LCMV CL13 plaque assay.** An LCMV CL13 plaque assay was performed in the presence or absence of ASP1570 (1  $\mu$ M). N.S. = not significant by Student t-test.



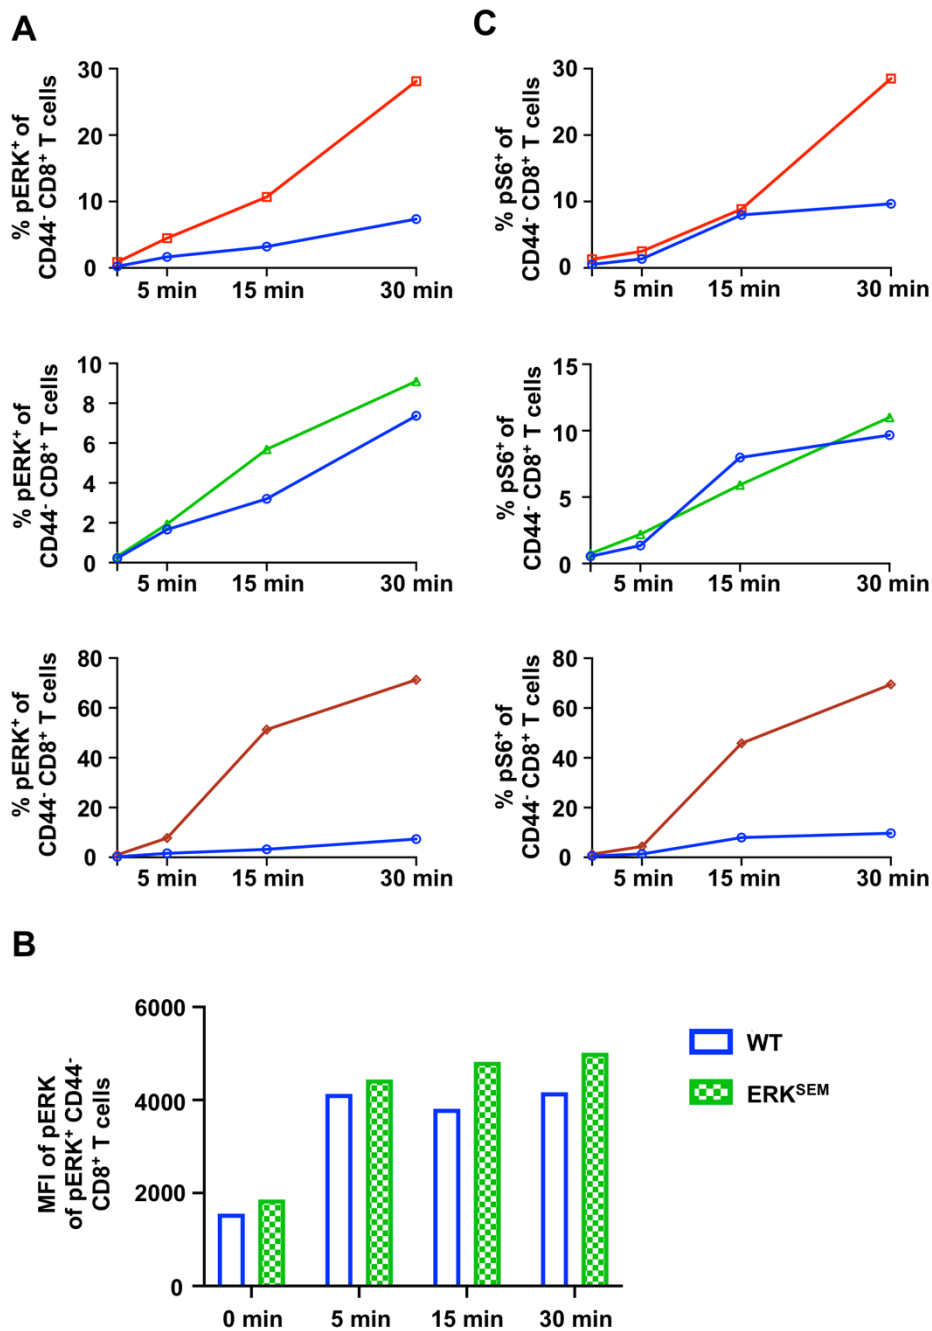

**Supplementary Figure 8. Phosphorylation of ERK and S6 in TCR-stimulated DGK $\zeta$  KO, ERK<sup>SEM</sup>, and ASP1570-treated CD8<sup>+</sup> T cells.** Splenocytes were stimulated with anti-CD3 antibody for the indicated times and (A) the fraction of CD44<sup>lo</sup> CD8<sup>+</sup> T cells displaying pERK, (B) the MFI of pERK in pERK<sup>+</sup> cells of WT and ERK<sup>SEM</sup>, and (C) the fraction of CD44<sup>lo</sup> CD8<sup>+</sup> T cells displaying pS6 was quantified by flow cytometry.
